# Supplementary material
Source: PubMed Central journal article supplement (PMC6604048)
Supplement: NIHMS1030618-supplement-A__B__C.pdf [file NIHMS1030618-supplement-A__B__C.pdf]

Appendix A. Search strategy

1) Web of Science

|   |                                             |                                                                                                                                                                                                                                                      |
|---|---------------------------------------------|------------------------------------------------------------------------------------------------------------------------------------------------------------------------------------------------------------------------------------------------------|
| # | <a href="#">290</a>                         | #4 AND #3 AND #2 AND #1<br>Timespan=All years<br>Search language=Auto                                                                                                                                                                                |
| # | <a href="#">Approximately<br/>1,258,533</a> | <b>TOPIC:</b> ("ankle") <i>OR</i> <b>TOPIC:</b> ("knee") <i>OR</i> <b>TOPIC:</b> ("hip") <i>OR</i> <b>TOPIC:</b> ("leg") <i>OR</i> <b>TOPIC:</b> ("trunk") <i>OR</i> <b>TOPIC:</b> ("lower extremity")<br>Timespan=All years<br>Search language=Auto |
| # | <a href="#">Approximately<br/>3,921,893</a> | <b>TOPIC:</b> ("intervention") <i>OR</i> <b>TOPIC:</b> ("training") <i>OR</i> <b>TOPIC:</b> ("program") <i>OR</i> <b>TOPIC:</b> ("injury prevention program") <i>OR</i> <b>TOPIC:</b> ("ipp")<br>Timespan=All years<br>Search language=Auto          |
| # | <a href="#">Approximately<br/>41,668</a>    | <b>TOPIC:</b> ("landing") <i>OR</i> <b>TOPIC:</b> ("landing tasks") <i>OR</i> <b>TOPIC:</b> ("jumping test") <i>OR</i> <b>TOPIC:</b> ("drop vertical jump")<br>Timespan=All years<br>Search language=Auto                                            |
| # | <a href="#">Approximately<br/>383,471</a>   | <b>TOPIC:</b> ("electromyography" OR "biomechanics" OR "neuromuscular")<br>Timespan=All years<br>Search language=Auto                                                                                                                                |

## 2) Medline

|                                      |
|--------------------------------------|
| 02/06/2015                           |
| 1. "electromyography".mp.            |
| 2. "biomechanic*".mp.                |
| 3. "neuromuscular".mp.               |
| 4. 1 or 2 or 3                       |
| 5. "landing".mp.                     |
| 6. "landing task*".mp.               |
| 7. "jumping test*".mp.               |
| 8. "drop vertical jump*".mp.         |
| 9. 5 or 6 or 7 or 8                  |
| 10. "intervention*".mp.              |
| 11. "training*".mp.                  |
| 12. "program*".mp.                   |
| 13. "injury prevention program*".mp. |
| 14. "IPP".mp.                        |
| 15. 10 or 11 or 12 or 13 or 14       |
| 16. "ankle*".mp.                     |
| 17. "knee".mp.                       |
| 18. "hip".mp.                        |
| 19. "leg".mp.                        |
| 20. "trunk".mp.                      |
| 21. "lower extremity*".mp.           |
| 22. 16 or 17 or 18 or 19 or 20 or 21 |
| 23. 4 and 9 and 15 and 22            |
| 24. limit 23 to english language     |

### 3) SCOPUS

|                                                                                                                                                                                                                                                                                                                                                                                                                                                                                           |
|-------------------------------------------------------------------------------------------------------------------------------------------------------------------------------------------------------------------------------------------------------------------------------------------------------------------------------------------------------------------------------------------------------------------------------------------------------------------------------------------|
| <p>5 <a href="#">TITLE-ABS-KEY ( "electromyography" OR "biomechanics" OR "Neuromuscular" )</a><br/>02 Jun 2015<br/>323,232</p>                                                                                                                                                                                                                                                                                                                                                            |
| <p>result 4 <a href="#">TITLE-ABS-KEY ( "landing" OR "landing tasks" OR "jumping test" OR "drop vertical jump" )</a><br/>02 Jun 2015<br/>34,316</p>                                                                                                                                                                                                                                                                                                                                       |
| <p>3 <a href="#">TITLE-ABS-KEY ( "intervention" OR "training" OR "program" OR "injury prevention program" OR "IPP" )</a><br/>02 Jun 2015<br/>last run on<br/><a href="#">View new results</a><br/>2,878,626<br/>documents</p>                                                                                                                                                                                                                                                             |
| <p>2 <a href="#">TITLE-ABS-KEY ( "ankle" OR "knee" OR "hip" OR "leg" OR "trunk" OR "lower extremity" )</a><br/>02 Jun 2015<br/>657,978</p>                                                                                                                                                                                                                                                                                                                                                |
| <p>1 ( <a href="#">TITLE-ABS-KEY ( "electromyography" OR "biomechanics" OR "Neuromuscular" )</a> ) AND ( <a href="#">TITLE-ABS-KEY ( "landing" OR "landing tasks" OR "jumping test" OR "drop vertical jump" )</a> ) AND ( <a href="#">TITLE-ABS-KEY ( "intervention" OR "training" OR "program" OR "injury prevention program" OR "IPP" )</a> ) AND ( <a href="#">TITLE-ABS-KEY ( "ankle" OR "knee" OR "hip" OR "leg" OR "trunk" OR "lower extremity" )</a> )<br/>02 Jun 2015<br/>362</p> |

#### 4) CINAHL

| Search Terms | Search Options                                                                                                                                | Actions                                                      |
|--------------|-----------------------------------------------------------------------------------------------------------------------------------------------|--------------------------------------------------------------|
| S24          | S4 AND S9 AND S15 AND S22                                                                                                                     | Limiters - English Language<br>Search modes - Boolean/Phrase |
| S23          | S4 AND S9 AND S15 AND S22                                                                                                                     | Search modes - Boolean/Phrase                                |
| S22          | S16 OR S17 OR S18 OR S19 OR S20 OR S21                                                                                                        | Search modes - Boolean/Phrase                                |
| S21          | "lower extremity"                                                                                                                             | Search modes - Boolean/Phrase                                |
| S20          | "trunk"                                                                                                                                       | Search modes - Boolean/Phrase                                |
| S19          | "leg"                                                                                                                                         | Search modes - Boolean/Phrase                                |
| S18          | "hip"                                                                                                                                         | Search modes - Boolean/Phrase                                |
| S17          | "knee"                                                                                                                                        | Search modes - Boolean/Phrase                                |
| S16          | (MH "Lateral Ligament, Ankle") OR (MH "Ankle Injuries+") OR (MH "Ankle Joint") OR (MH "Ankle") OR "ankle"                                     | Search modes - Boolean/Phrase                                |
| S15          | S10 OR S11 OR S12 OR S13 OR S14                                                                                                               | Search modes - Boolean/Phrase                                |
| S14          | "IPP"                                                                                                                                         | Search modes - Boolean/Phrase                                |
| S13          | (MH "Athletic Training Programs") OR (MH "Resistance Training") OR "injury prevention program" OR (MH "Posterior Cruciate Ligament Injuries") | Search modes - Boolean/Phrase                                |
| S12          | (MH "Athletic Training Programs") OR (MH "Substance Use Rehabilitation Programs+") OR (MH                                                     | Search modes - Boolean/Phrase                                |

|     |                                                                                                                                                                                                                                                                                                                                                                                        |                                                                                                                                                           |
|-----|----------------------------------------------------------------------------------------------------------------------------------------------------------------------------------------------------------------------------------------------------------------------------------------------------------------------------------------------------------------------------------------|-----------------------------------------------------------------------------------------------------------------------------------------------------------|
|     | "Resistance Training") OR ""program""                                                                                                                                                                                                                                                                                                                                                  |                                                                                                                                                           |
| S11 | (MH "Athletic Training Programs") OR (MH "Students, Athletic Training") OR (MH "Sport Specific Training") OR (MH "Balance Training, Physical") OR (MH "Athletic Training+") OR (MH "Training Effect (Physiology)") OR (MH "Resistance Training") OR (MH "Military Training") OR (MH "Education, Athletic Training") OR (MH "Body-Weight-Supported Treadmill Training") OR ""training"" | Search modes - Boolean/Phrase                                                                                                                             |
| S10 | ""intervention""                                                                                                                                                                                                                                                                                                                                                                       | Search modes - Boolean/Phrase                                                                                                                             |
| S9  | S5 OR S6 OR S7 OR S8                                                                                                                                                                                                                                                                                                                                                                   | Search modes - Boolean/Phrase                                                                                                                             |
| S8  | (MH "Jumping") OR (MH "Patient Dropouts") OR (MH "Extreme Sports") OR ""drop vertical jump""                                                                                                                                                                                                                                                                                           | Search modes - Boolean/Phrase                                                                                                                             |
| S7  | ""jumping test""                                                                                                                                                                                                                                                                                                                                                                       | Search modes - Boolean/Phrase                                                                                                                             |
| S6  | (MH "Task Performance and Analysis+") OR (MH "Workload Measurement") OR ""landing task""                                                                                                                                                                                                                                                                                               | Search modes - Boolean/Phrase                                                                                                                             |
| S5  | (MH "Jumping") OR ""landing""                                                                                                                                                                                                                                                                                                                                                          | Search modes - Boolean/Phrase                                                                                                                             |
| S4  | S1 OR S2 OR S3                                                                                                                                                                                                                                                                                                                                                                         | Search modes - Boolean/Phrase                                                                                                                             |
| S3  | ""neuromuscular""                                                                                                                                                                                                                                                                                                                                                                      | Limiters - English Language<br><br>Expanders - Apply related words; Also search within the full text of the articles<br><br>Search modes - Boolean/Phrase |
| S2  | (MH "Biomechanics+") OR ""biomechanics""                                                                                                                                                                                                                                                                                                                                               | Limiters - English                                                                                                                                        |

|    |                                               |                                                                                                                                                           |
|----|-----------------------------------------------|-----------------------------------------------------------------------------------------------------------------------------------------------------------|
|    |                                               | Language<br><br>Expanders - Apply related words; Also search within the full text of the articles<br><br>Search modes - Boolean/Phrase                    |
| S1 | "electromyography" OR (MH "Electromyography") | Limiters - English Language<br><br>Expanders - Apply related words; Also search within the full text of the articles<br><br>Search modes - Boolean/Phrase |

### 5) SportDiscus

| <a href="#">Search ID#</a> | Search Terms                           | Search Options                |
|----------------------------|----------------------------------------|-------------------------------|
| S47                        | S28 AND S33 AND S39 AND S46            | Search modes - Boolean/Phrase |
| S46                        | S40 OR S41 OR S42 OR S43 OR S44 OR S45 | Search modes - Boolean/Phrase |
| S45                        | 'lower extremity'                      | Search modes - Boolean/Phrase |
| S44                        | 'trunk'                                | Search modes - Boolean/Phrase |
| S43                        | 'leg'                                  | Search modes - Boolean/Phrase |
| S42                        | 'hip'                                  | Search modes - Boolean/Phrase |
| S41                        | 'knee'                                 | Search modes - Boolean/Phrase |

|     |                                 |                                                                            |
|-----|---------------------------------|----------------------------------------------------------------------------|
| S40 | 'ankle'                         | Search modes -<br>Boolean/Phrase                                           |
| S39 | S34 OR S35 OR S36 OR S37 OR S38 | Search modes -<br>Boolean/Phrase                                           |
| S38 | 'IPP'                           | Search modes -<br>Boolean/Phrase                                           |
| S37 | 'injury prevention program'     | Search modes -<br>Boolean/Phrase                                           |
| S36 | 'program'                       | Search modes -<br>Boolean/Phrase                                           |
| S35 | 'training'                      | Search modes -<br>Boolean/Phrase                                           |
| S34 | 'intervention'                  | Search modes -<br>Boolean/Phrase                                           |
| S33 | S29 OR S30 OR S31 OR S32        | Search modes -<br>Boolean/Phrase                                           |
| S32 | 'drop vertical jump'            | Search modes -<br>Boolean/Phrase                                           |
| S31 | 'jumping test'                  | Search modes -<br>Boolean/Phrase                                           |
| S30 | 'landing tasks'                 | Search modes -<br>Boolean/Phrase                                           |
| S29 | 'landing'                       | Search modes -<br>Boolean/Phrase                                           |
| S28 | S25 OR S26 OR S27               | Search modes -<br>Boolean/Phrase                                           |
| S27 | 'neuromuscular'                 | Expanders - Apply<br>related words<br><br>Search modes -<br>Boolean/Phrase |
| S26 | 'biomechanics'                  | Expanders - Apply<br>related words<br><br>Search modes -<br>Boolean/Phrase |
| S25 | 'electromyography'              | Expanders - Apply<br>related words<br><br>Search modes -<br>Boolean/Phrase |

|     |                                                                                                                                                 |                                                              |
|-----|-------------------------------------------------------------------------------------------------------------------------------------------------|--------------------------------------------------------------|
| S24 | S4 AND S9 AND S15 AND S22                                                                                                                       | Limiters - English Language<br>Search modes - Boolean/Phrase |
| S23 | S4 AND S9 AND S15 AND S22                                                                                                                       | Search modes - Boolean/Phrase                                |
| S22 | S16 OR S17 OR S18 OR S19 OR S20 OR S21                                                                                                          | Search modes - Boolean/Phrase                                |
| S21 | ""lower extremity""                                                                                                                             | Search modes - Boolean/Phrase                                |
| S20 | ""trunk""                                                                                                                                       | Search modes - Boolean/Phrase                                |
| S19 | ""leg""                                                                                                                                         | Search modes - Boolean/Phrase                                |
| S18 | ""hip""                                                                                                                                         | Search modes - Boolean/Phrase                                |
| S17 | ""knee""                                                                                                                                        | Search modes - Boolean/Phrase                                |
| S16 | (MH "Lateral Ligament, Ankle") OR (MH "Ankle Injuries+") OR (MH "Ankle Joint") OR (MH "Ankle") OR ""ankle""                                     | Search modes - Boolean/Phrase                                |
| S15 | S10 OR S11 OR S12 OR S13 OR S14                                                                                                                 | Search modes - Boolean/Phrase                                |
| S14 | ""IPP""                                                                                                                                         | Search modes - Boolean/Phrase                                |
| S13 | (MH "Athletic Training Programs") OR (MH "Resistance Training") OR ""injury prevention program"" OR (MH "Posterior Cruciate Ligament Injuries") | Search modes - Boolean/Phrase                                |
| S12 | (MH "Athletic Training Programs") OR (MH "Substance Use Rehabilitation Programs+") OR (MH "Resistance Training") OR ""program""                 | Search modes - Boolean/Phrase                                |
| S11 | (MH "Athletic Training Programs") OR (MH "Students, Athletic Training") OR (MH "Sport Specific Training") OR (MH "Balance Training,             | Search modes - Boolean/Phrase                                |



|     |                                                                                                                                                                                                                                                    |                                                                                                                                                           |
|-----|----------------------------------------------------------------------------------------------------------------------------------------------------------------------------------------------------------------------------------------------------|-----------------------------------------------------------------------------------------------------------------------------------------------------------|
|     | Physical") OR (MH "Athletic Training+") OR (MH "Training Effect (Physiology)") OR (MH "Resistance Training") OR (MH "Military Training") OR (MH "Education, Athletic Training") OR (MH "Body-Weight-Supported Treadmill Training") OR ""training"" |                                                                                                                                                           |
| S10 | ""intervention""                                                                                                                                                                                                                                   | Search modes - Boolean/Phrase                                                                                                                             |
| S9  | S5 OR S6 OR S7 OR S8                                                                                                                                                                                                                               | Search modes - Boolean/Phrase                                                                                                                             |
| S8  | (MH "Jumping") OR (MH "Patient Dropouts") OR (MH "Extreme Sports") OR ""drop vertical jump""                                                                                                                                                       | Search modes - Boolean/Phrase                                                                                                                             |
| S7  | ""jumping test""                                                                                                                                                                                                                                   | Search modes - Boolean/Phrase                                                                                                                             |
| S6  | (MH "Task Performance and Analysis+") OR (MH "Workload Measurement") OR ""landing task""                                                                                                                                                           | Search modes - Boolean/Phrase                                                                                                                             |
| S5  | (MH "Jumping") OR ""landing""                                                                                                                                                                                                                      | Search modes - Boolean/Phrase                                                                                                                             |
| S4  | S1 OR S2 OR S3                                                                                                                                                                                                                                     | Search modes - Boolean/Phrase                                                                                                                             |
| S3  | ""neuromuscular""                                                                                                                                                                                                                                  | Limiters - English Language<br><br>Expanders - Apply related words; Also search within the full text of the articles<br><br>Search modes - Boolean/Phrase |
| S2  | (MH "Biomechanics+") OR ""biomechanics""                                                                                                                                                                                                           | Limiters - English Language<br><br>Expanders - Apply related words; Also search within the full text of the articles                                      |

|    |                                               |                                                                                                                                                                  |
|----|-----------------------------------------------|------------------------------------------------------------------------------------------------------------------------------------------------------------------|
|    |                                               | Search modes - Boolean/Phrase                                                                                                                                    |
| S1 | "electromyography" OR (MH "Electromyography") | <p>Limiters - English Language</p> <p>Expanders - Apply related words; Also search within the full text of the articles</p> <p>Search modes - Boolean/Phrase</p> |

## 6) EMBASE

|                                                                                                                                    |
|------------------------------------------------------------------------------------------------------------------------------------|
| <input type="checkbox"/> #22#4 AND #9 AND #14 AND #21Systematic Review IPP vs Landing2015-06-022015-06-02140                       |
| <input type="checkbox"/> #21#15 OR #16 OR #17 OR #18 OR #19 OR #20Systematic Review IPP vs Landing2015-06-022015-06-02256125       |
| <input type="checkbox"/> #20'lower extremity'/exp OR 'lower extremities'Systematic Review IPP vs Landing2015-06-022015-06-02194240 |
| <input type="checkbox"/> #19'trunk'/expSystematic Review IPP vs Landing2015-06-022015-06-028450                                    |
| <input checked="" type="checkbox"/> #18'leg'/exp OR 'legs'Systematic Review IPP vs Landing2015-06-022015-06-02207053               |
| <input type="checkbox"/> #17'hip'/expSystematic Review IPP vs Landing2015-06-022015-06-0239262                                     |
| <input type="checkbox"/> #16'knee'/expSystematic Review IPP vs Landing2015-06-022015-06-0249202                                    |
| <input checked="" type="checkbox"/> #15'ankle'/expSystematic Review IPP vs Landing2015-06-022015-06-0222646                        |
| <input type="checkbox"/> #14#10 OR #11 OR #12 OR #13Systematic Review IPP vs Landing2015-06-022015-06-021770204                    |
| <input type="checkbox"/> #13'injury prevention program' OR 'ipp'Systematic Review IPP vs Landing2015-06-022015-06-023478           |
| • <input type="checkbox"/> #12'program'Systematic Review IPP vs Landing2015-06-022015-06-02989150                                  |
| • <input type="checkbox"/> #11'training'/expSystematic Review IPP vs Landing2015-06-022015-06-0267636                              |
| • <input type="checkbox"/> #10'intervention' OR 'interventions'Systematic Review IPP vs Landing2015-06-022015-06-02828736          |
| • <input type="checkbox"/> #9#5 OR #6 OR #7 OR #8Systematic Review IPP vs Landing2015-06-022015-06-0261425                         |
| • <input type="checkbox"/> #8'drop vertical jump'Systematic Review IPP vs Landing2015-06-022015-06-0255                            |
| <input type="checkbox"/> #7'jumping test' OR 'jumpig'Systematic Review IPP vs Landing2015-06-022015-06-0294                        |
| <input type="checkbox"/> #6'landing task' OR 'landing tasks'Systematic Review IPP vs Landing2015-06-022015-06-02157                |
| <input type="checkbox"/> #5'landing' OR 'land'Systematic Review IPP vs Landing2015-06-022015-06-0261315                            |
| <input type="checkbox"/> #4#1 OR #2 OR #3Systematic Review IPP vs Landing2015-06-022015-06-02243800                                |
| <input checked="" type="checkbox"/> #3'neuromuscular'Systematic Review IPP vs Landing2015-06-022015-06-0287020                     |
| <input type="checkbox"/> #2'biomechanics'/exp OR 'biomechanic'Systematic Review IPP vs Landing2015-06-022015-06-0279813            |

#1'electromyography'/exp OR 'electromyography' OR 'emg'Systematic Review IPP  
vs Landing2015-06-022015-06-0290516

Appendix B. Methodological quality of selected articles.

| (0) Clearly no / (1) Maybe or inadequate information / (2) Clearly yes |                                                                        |                                                                                   |                                                                                                                         |                                                                                                                                       |                                                                              |                                                             |                                                                                                                         |                                                                                                                                                                                  |                                                                                            |                                                                |                                                                                |                                                          |                                                |                                               |                                                                                                                                                                                                    |       |  |
|------------------------------------------------------------------------|------------------------------------------------------------------------|-----------------------------------------------------------------------------------|-------------------------------------------------------------------------------------------------------------------------|---------------------------------------------------------------------------------------------------------------------------------------|------------------------------------------------------------------------------|-------------------------------------------------------------|-------------------------------------------------------------------------------------------------------------------------|----------------------------------------------------------------------------------------------------------------------------------------------------------------------------------|--------------------------------------------------------------------------------------------|----------------------------------------------------------------|--------------------------------------------------------------------------------|----------------------------------------------------------|------------------------------------------------|-----------------------------------------------|----------------------------------------------------------------------------------------------------------------------------------------------------------------------------------------------------|-------|--|
| PAPER                                                                  | Q.1<br>Is the hypothesis/aim/objective of the study clearly described? | Q.2<br>Power analysis was performed and justification of study sample size given. | Q.3<br>Participant's demographics were clearly defined: gender, age, body height and body mass at the time of the test. | Q.4<br>Participant's characteristics were clearly defined: sport, experience or activity level and level of play at the time of test. | Q.5<br>Inclusion and exclusion criteria were clearly stated for participants | Q.6<br>Are the interventions of interest clearly described? | Q.7<br>Proper training and practice trials of the test were given to the athletes allowing for adequate familiarisation | Q.8<br>Methods were described in great detail to allow replication of the test. Testing devices, no. of trials, speed, angle, height and test limb were included when applicable | Q.9<br>Was an attempt made to blind those measuring the main outcomes of the intervention? | Q.10<br>Test-retest reliability of measurement device reported | Q.11<br>Have the characteristics of patients lost to follow-up been described? | Q.12<br>Was compliance with the interventions monitored? | Q.13<br>Outcome variables were clearly defined | Q.14<br>Statistical analyses were appropriate | Q.15<br>Does the study provide estimates of the random variability in the data for the main outcomes? Ex. Presenting and defining the dispersion measurements (SD or SEM and Confidence Intervals) | TOTAL |  |
| 1                                                                      | Stearns, 2014                                                          | 2                                                                                 | 2                                                                                                                       | 2                                                                                                                                     | 2                                                                            | 2                                                           | 2                                                                                                                       | 2                                                                                                                                                                                | 0                                                                                          | 0                                                              | 2                                                                              | 1                                                        | 2                                              | 2                                             | 2                                                                                                                                                                                                  | 25    |  |
| 2                                                                      | Tate, 2013                                                             | 2                                                                                 | 2                                                                                                                       | 2                                                                                                                                     | 2                                                                            | 2                                                           | 2                                                                                                                       | 2                                                                                                                                                                                | 0                                                                                          | 0                                                              | 1                                                                              | 2                                                        | 2                                              | 2                                             | 2                                                                                                                                                                                                  | 25    |  |
| 3                                                                      | Celebrini, 2012                                                        | 2                                                                                 | 0                                                                                                                       | 2                                                                                                                                     | 2                                                                            | 2                                                           | 2                                                                                                                       | 2                                                                                                                                                                                | 0                                                                                          | 2                                                              | 2                                                                              | 2                                                        | 2                                              | 2                                             | 2                                                                                                                                                                                                  | 26    |  |
| 4                                                                      | Lim, 2009                                                              | 2                                                                                 | 2                                                                                                                       | 2                                                                                                                                     | 2                                                                            | 1                                                           | 2                                                                                                                       | 0                                                                                                                                                                                | 2                                                                                          | 2                                                              | 2                                                                              | 0                                                        | 2                                              | 2                                             | 2                                                                                                                                                                                                  | 23    |  |
| 5                                                                      | Pfile, 2013                                                            | 2                                                                                 | 0                                                                                                                       | 2                                                                                                                                     | 2                                                                            | 1                                                           | 2                                                                                                                       | 2                                                                                                                                                                                | 2                                                                                          | 0                                                              | 2                                                                              | 2                                                        | 2                                              | 2                                             | 2                                                                                                                                                                                                  | 25    |  |
| 6                                                                      | Brown, 2014                                                            | 2                                                                                 | 2                                                                                                                       | 2                                                                                                                                     | 2                                                                            | 2                                                           | 2                                                                                                                       | 0                                                                                                                                                                                | 2                                                                                          | 0                                                              | 1                                                                              | 2                                                        | 2                                              | 2                                             | 2                                                                                                                                                                                                  | 23    |  |
| 7                                                                      | Beaulieu, 2014                                                         | 2                                                                                 | 0                                                                                                                       | 2                                                                                                                                     | 2                                                                            | 1                                                           | 2                                                                                                                       | 2                                                                                                                                                                                | 0                                                                                          | 0                                                              | 0                                                                              | 0                                                        | 2                                              | 2                                             | 2                                                                                                                                                                                                  | 19    |  |
| 8                                                                      | Pollard, 2006                                                          | 2                                                                                 | 0                                                                                                                       | 2                                                                                                                                     | 2                                                                            | 2                                                           | 2                                                                                                                       | 2                                                                                                                                                                                | 0                                                                                          | 0                                                              | 2                                                                              | 2                                                        | 2                                              | 2                                             | 2                                                                                                                                                                                                  | 24    |  |
| 9                                                                      | Herman, 2008                                                           | 2                                                                                 | 0                                                                                                                       | 2                                                                                                                                     | 2                                                                            | 2                                                           | 2                                                                                                                       | 2                                                                                                                                                                                | 0                                                                                          | 0                                                              | 2                                                                              | 2                                                        | 2                                              | 2                                             | 2                                                                                                                                                                                                  | 24    |  |
| 10                                                                     | Letafatkar, 2015                                                       | 2                                                                                 | 2                                                                                                                       | 1                                                                                                                                     | 2                                                                            | 2                                                           | 2                                                                                                                       | 2                                                                                                                                                                                | 0                                                                                          | 1                                                              | 0                                                                              | 1                                                        | 2                                              | 2                                             | 2                                                                                                                                                                                                  | 23    |  |
| 11                                                                     | Myer, 2006 (a)                                                         | 2                                                                                 | 2                                                                                                                       | 2                                                                                                                                     | 2                                                                            | 0                                                           | 2                                                                                                                       | 0                                                                                                                                                                                | 2                                                                                          | 0                                                              | 2                                                                              | 2                                                        | 2                                              | 2                                             | 2                                                                                                                                                                                                  | 22    |  |
| 12                                                                     | Myer, 2006 (b)                                                         | 2                                                                                 | 2                                                                                                                       | 2                                                                                                                                     | 2                                                                            | 0                                                           | 2                                                                                                                       | 0                                                                                                                                                                                | 2                                                                                          | 2                                                              | 2                                                                              | 2                                                        | 2                                              | 2                                             | 1                                                                                                                                                                                                  | 23    |  |
| 13                                                                     | Irmischer, 2004                                                        | 2                                                                                 | 0                                                                                                                       | 2                                                                                                                                     | 2                                                                            | 1                                                           | 2                                                                                                                       | 2                                                                                                                                                                                | 0                                                                                          | 0                                                              | 2                                                                              | 2                                                        | 2                                              | 2                                             | 2                                                                                                                                                                                                  | 23    |  |
| 14                                                                     | Greska, 2012                                                           | 2                                                                                 | 0                                                                                                                       | 2                                                                                                                                     | 2                                                                            | 1                                                           | 2                                                                                                                       | 0                                                                                                                                                                                | 2                                                                                          | 0                                                              | 1                                                                              | 2                                                        | 1                                              | 1                                             | 2                                                                                                                                                                                                  | 18    |  |
| 15                                                                     | Nagano, 2011                                                           | 2                                                                                 | 0                                                                                                                       | 2                                                                                                                                     | 2                                                                            | 2                                                           | 2                                                                                                                       | 2                                                                                                                                                                                | 0                                                                                          | 1                                                              | 0                                                                              | 0                                                        | 2                                              | 2                                             | 2                                                                                                                                                                                                  | 21    |  |
| 16                                                                     | Hewett, 1996                                                           | 2                                                                                 | 0                                                                                                                       | 2                                                                                                                                     | 2                                                                            | 0                                                           | 2                                                                                                                       | 2                                                                                                                                                                                | 0                                                                                          | 0                                                              | 0                                                                              | 0                                                        | 2                                              | 2                                             | 2                                                                                                                                                                                                  | 18    |  |
| 17                                                                     | Dempsey, 2014                                                          | 2                                                                                 | 0                                                                                                                       | 2                                                                                                                                     | 1                                                                            | 1                                                           | 2                                                                                                                       | 0                                                                                                                                                                                | 2                                                                                          | 0                                                              | 1                                                                              | 2                                                        | 2                                              | 2                                             | 2                                                                                                                                                                                                  | 19    |  |
| 18                                                                     | Iida, 2013                                                             | 2                                                                                 | 2                                                                                                                       | 2                                                                                                                                     | 2                                                                            | 0                                                           | 2                                                                                                                       | 0                                                                                                                                                                                | 2                                                                                          | 0                                                              | 1                                                                              | 0                                                        | 2                                              | 2                                             | 2                                                                                                                                                                                                  | 19    |  |
| 19                                                                     | Vescovi, 2008                                                          | 2                                                                                 | 2                                                                                                                       | 2                                                                                                                                     | 2                                                                            | 1                                                           | 2                                                                                                                       | 2                                                                                                                                                                                | 0                                                                                          | 0                                                              | 0                                                                              | 0                                                        | 2                                              | 2                                             | 2                                                                                                                                                                                                  | 21    |  |
| 20                                                                     | Chappell, 2008                                                         | 2                                                                                 | 0                                                                                                                       | 2                                                                                                                                     | 2                                                                            | 1                                                           | 2                                                                                                                       | 0                                                                                                                                                                                | 2                                                                                          | 0                                                              | 2                                                                              | 1                                                        | 2                                              | 1                                             | 2                                                                                                                                                                                                  | 19    |  |
| 21                                                                     | Louw, 2006                                                             | 2                                                                                 | 0                                                                                                                       | 2                                                                                                                                     | 2                                                                            | 0                                                           | 2                                                                                                                       | 2                                                                                                                                                                                | 0                                                                                          | 0                                                              | 0                                                                              | 0                                                        | 2                                              | 1                                             | 2                                                                                                                                                                                                  | 17    |  |
| 22                                                                     | Ortiz, 2010                                                            | 2                                                                                 | 0                                                                                                                       | 2                                                                                                                                     | 2                                                                            | 1                                                           | 2                                                                                                                       | 2                                                                                                                                                                                | 2                                                                                          | 0                                                              | 2                                                                              | 0                                                        | 1                                              | 2                                             | 0                                                                                                                                                                                                  | 20    |  |
| 23                                                                     | Makaruk, 2014                                                          | 2                                                                                 | 0                                                                                                                       | 2                                                                                                                                     | 2                                                                            | 0                                                           | 2                                                                                                                       | 0                                                                                                                                                                                | 2                                                                                          | 2                                                              | 0                                                                              | 0                                                        | 2                                              | 2                                             | 2                                                                                                                                                                                                  | 18    |  |
| 24                                                                     | Myer, 2007                                                             | 2                                                                                 | 0                                                                                                                       | 2                                                                                                                                     | 2                                                                            | 0                                                           | 0                                                                                                                       | 0                                                                                                                                                                                | 2                                                                                          | 0                                                              | 2                                                                              | 2                                                        | 2                                              | 2                                             | 2                                                                                                                                                                                                  | 18    |  |
| 25                                                                     | Myer, 2005                                                             | 2                                                                                 | 0                                                                                                                       | 2                                                                                                                                     | 2                                                                            | 0                                                           | 2                                                                                                                       | 0                                                                                                                                                                                | 2                                                                                          | 2                                                              | 0                                                                              | 2                                                        | 2                                              | 2                                             | 1                                                                                                                                                                                                  | 19    |  |
| 26                                                                     | Lephart, 2005                                                          | 2                                                                                 | 0                                                                                                                       | 2                                                                                                                                     | 2                                                                            | 1                                                           | 2                                                                                                                       | 2                                                                                                                                                                                | 0                                                                                          | 0                                                              | 0                                                                              | 0                                                        | 2                                              | 2                                             | 2                                                                                                                                                                                                  | 19    |  |
| 27                                                                     | Araujo, 2015                                                           | 2                                                                                 | 1                                                                                                                       | 2                                                                                                                                     | 2                                                                            | 0                                                           | 2                                                                                                                       | 2                                                                                                                                                                                | 0                                                                                          | 0                                                              | 0                                                                              | 0                                                        | 2                                              | 2                                             | 2                                                                                                                                                                                                  | 19    |  |
| 28                                                                     | McCurdy, 2012                                                          | 2                                                                                 | 0                                                                                                                       | 2                                                                                                                                     | 2                                                                            | 1                                                           | 2                                                                                                                       | 2                                                                                                                                                                                | 0                                                                                          | 0                                                              | 0                                                                              | 0                                                        | 2                                              | 2                                             | 2                                                                                                                                                                                                  | 19    |  |

## Appendix C. Characteristics of included studies

| Study                            | Participants Features      | Sample Size and sex (Intervention group) | Age (years) mean (SD)            | Height (m) mean (SD)               | Weight (Kg) mean (SD)            | Landing task                           | IPP description                                                                                                                                                                                                     | Duration and progression of IPP                                                                                               |
|----------------------------------|----------------------------|------------------------------------------|----------------------------------|------------------------------------|----------------------------------|----------------------------------------|---------------------------------------------------------------------------------------------------------------------------------------------------------------------------------------------------------------------|-------------------------------------------------------------------------------------------------------------------------------|
| 1) Letafatkar <i>et al.</i> 2015 | Athletes                   | 15<br>(♀)                                | 24.32 ± 3.47                     | 1.7 ± 0.08                         | 65.4 ± 6.6                       | Single leg drop-landing                | Perturbation drills consisted of three techniques: rocker board, roller board, and roller board with stationary platform.                                                                                           | 6 weeks; 18 sessions in total and 1 hour each.                                                                                |
| 2) Araujo, 2015                  | Athletes (Capoeira)        | 16<br>(♀)                                | 27.3 ± 3.7                       | 1.65 ± 4,0                         | 59.7 ± 6.3                       | Drop jump landing task                 | CORE Training: Plank, side plank, supine bridge, single leg supine bridge, Russian twister, spilt legs scissors.                                                                                                    | 6 weeks; 3 x week<br><b>Progression:</b> increased number of repetitions and exercise difficulty weekly.                      |
| 3) Stearns <i>et al.</i> 2014    | Recreationally active      | 18<br>(♀)                                | 23.7 ± 1.2                       | 1.7 ± 0.1                          | 64.0 ± 10.7                      | Drop-jump task                         | The training focused on recruitment of hip extensor muscles through the use of plyometric (Plyo) activities such as jumping and landing, and balance training done in kneeling on a BOSU (BOSU, Canton, Ohio, USA). | 4 weeks, 3 x week, 30 min per session.<br><b>Progression:</b> increased number of repetitions and exercise difficulty weekly. |
| 4) Makaruk <i>et al.</i> 2014    | Untrained college students | (a) 12<br>(b) 12<br>(♂)                  | (a) 22.2 ± 1.1<br>(b) 22.7 ± 1.4 | (a) 1.81 ± 0.06<br>(b) 1.84 ± 0.07 | (a) 76.8 ± 5.9<br>(b) 77.4 ± 6.2 | Drop vertical jump (DJ <sub>60</sub> ) | Plyometric exercise programme:<br>(a) SJG - Each set involved 3 repetitions, but with a 4-5 second break between each repetition;<br>(b) RJG - Consecutive Jump repetitions                                         | 6 weeks, 3 x week, 50-60 min per session. <b>Progression:</b> increased height of jump and exercise difficulty weekly.        |
| 5) Dempsey <i>et al.</i> 2014    | Athletes                   | 17<br>(♂)                                | 20.5 ± 1.8                       | 1.80 ± 0.07                        | 78.1 ± 14.2                      | Single Leg vertical Jump               | Landing Training Program: single leg landing with and without feedback, drill with change direction.                                                                                                                | 6 weeks, 2 x week.<br><b>Progression:</b> training drills moved from closed (controlled) to open (game-like) tasks.           |

|                                  |                       |                                  |                                                    |                                                       |                                                     |                                   |                                                                                                                                                                               |                                                                                                                                                                                                     |
|----------------------------------|-----------------------|----------------------------------|----------------------------------------------------|-------------------------------------------------------|-----------------------------------------------------|-----------------------------------|-------------------------------------------------------------------------------------------------------------------------------------------------------------------------------|-----------------------------------------------------------------------------------------------------------------------------------------------------------------------------------------------------|
| 6) Brown <i>et al.</i> 2014      | Athletes              | (a) 7<br>(b) 13<br>(c) 10<br>(♀) | (a) 15.0 ± 0.6<br>(b) 14.8 ± 0.6<br>(c) 14.1 ± 1.2 | (a) 1.66 ± 0.07<br>(b) 1.64 ± 0.02<br>(c) 1.63 ± 0.08 | (a) 59.5 ± 8.9<br>(b) 53.9 ± 10.1<br>(c) 50.6 ± 8.5 | Drop vertical jump<br>(Bilateral) | (a) CORE + balance exercises;<br>(b) Plyometric<br>(c) Neuromuscular (core strength and balance, plyometrics, resistance, and speed Training)                                 | 6 weeks; 3 x week, 18 sessions in total.<br><b>Progression:</b> increased repetitions and exercise difficulty weekly.                                                                               |
| 7) Beaulieu <i>et al.</i> 2014   | Recreationally active | 11<br>(♀)                        | 21.9 ± 1.8                                         | 1.65 ± 0.05                                           | 60.9 ± 10.8                                         | Drop vertical jump                | A double-leg landing training program with real-time visual feedback                                                                                                          | 2 training sessions; 6 x 5 reps of double-leg maximum vertical jumps were performed.                                                                                                                |
| 8) Tate <i>et al.</i> 2013       | Recreational athletes | 13<br>(♀)                        | 21.7 ± 1.9                                         | 1.66 ± 0.08                                           | 62.4 ± 7.0                                          | Countermovement jump              | Jump training instructions with mirror feedback. *Analysis made using the Home-based practice retention test 1.                                                               | 1 supervised session of 3 x 5 reps of a jumping-landing practice and more 2 unsupervised home-based practices consisted of 2 sessions of jump-landing practice using a mirror to monitor technique. |
| 9) Iida <i>et al.</i> 2013       | Healthy adult         | 10<br>(♂)                        | 25.3 ± 2.5                                         | 1.74 ± 5.7                                            | 67.9 ± 9.9                                          | Drop vertical jump                | Landing training that aims to decrease the landing impact                                                                                                                     | 2 weeks; 3 x week, 6 sessions in total.                                                                                                                                                             |
| 10) Pfile <i>et al.</i> 2013     | Lacrosse              | 9<br>(♀)                         | 14.8 ± 0.8                                         | 1.7 ± 0.07                                            | 57.7 ± 8.5                                          | Drop vertical jump                | Plyometric                                                                                                                                                                    | 4 weeks; 3 x week; 20 each session.                                                                                                                                                                 |
| 11) Greska <i>et al.</i> 2012    | Soccer athletes       | 12<br>(♀)                        | 19.2 ± 0.8                                         | 1.67 ± 0.1                                            | 60.2 ± 6.5                                          | Stop-jump task                    | Resistance training, Dynamic Warm-up, Speed / Quickness, Plyometric.                                                                                                          | 10 weeks; 3 x week; 30-60 each session.                                                                                                                                                             |
| 12) Celebrini <i>et al.</i> 2012 | Soccer players        | 7<br>(♀)                         | 15.1 ± 1.3                                         | 1.64 ± 0.05                                           | 58.3 ± 11.4                                         | Side Hop                          | The Core-PAC movement strategy includes a proximal to distal movement sequence. Core exercises, jogging, balance with rotation, lateral hops, Diagonal lunges, Diagonal hops. | 4 weeks; 2 x week; 20 min                                                                                                                                                                           |

|                                 |                                       |           |                                  |             |             |                         |                                                                                                                                                                                                                                                                                             |                                                                                                               |
|---------------------------------|---------------------------------------|-----------|----------------------------------|-------------|-------------|-------------------------|---------------------------------------------------------------------------------------------------------------------------------------------------------------------------------------------------------------------------------------------------------------------------------------------|---------------------------------------------------------------------------------------------------------------|
| 13) McCurdy, 2012               | Recreational athletes                 | 13<br>(♀) | 21 ± 1.8                         | 1.63 ± 8.7  | 63.6 ± 8.25 | Bilateral drop Jump     | Resistance training (weight-bearing free weight resistance). Bilateral squat, Lunge, Step-up, Romanian deadlift and Unilateral squat.                                                                                                                                                       | 8 weeks; 2 x week.<br><b>Progression:</b> increased intensity of the exercises.                               |
| 14) Nagano <i>et al.</i> 2011   | Basketball athletes                   | 8<br>(♀)  | 19.4 ± 0.7                       | 1.70 ± 0.05 | 64.1 ± 7.8  | Single leg drop         | During training, subjects practiced their fundamental basketball skills and additionally carried out jump and balance training to increase their landing skills. Squat jumps, 180° jumps, Single leg balance, Hop jump (both leg), Broad jump and hold, Crossover hop, hop, hop, stick etc. | 5 weeks; 3 x week; 20 min each session.<br><b>Progression:</b> Phase 1 – Technique and Phase 2 – Performance. |
| 15) Ortiz <i>et al.</i> 2010    | Soccer players                        | 14<br>(♀) | 14 to 15<br>*( SD not presented) | 1.61 ± 4.3  | 55.3 ± 7.1  | Single-legged drop jump | Flexibility Training, Functional Strength Training and Jump Training.                                                                                                                                                                                                                       | 6 weeks; 25-30 min each session.                                                                              |
| 16) Lim <i>et al.</i> 2009      | High school Basketball players        | 11<br>(♀) | 16.2 ± 1.2                       | 1.72 ± 0.05 | 64.2 ± 6.1  | rebound-jump task       | Sports Injury Prevention Training Program: Warm-up, Stretching, Strengthening, Plyometric, Agilities, and Alternative exercise–warm down.                                                                                                                                                   | 8 weeks; 20 min each session of their regular team basketball practice                                        |
| 17) Chappell <i>et al.</i> 2008 | College soccer and basketball players | 30<br>(♀) | 19 ± 1.2                         | 1.74 ± 0.08 | 69.8 ± 10.9 | Drop vertical jump      | Core strengthening exercises, dynamic joint stability and balance training, jump training, and plyometric exercises.                                                                                                                                                                        | 6 weeks, 6 x weeks, 15-20 min each session.                                                                   |
| 18) Vescovi <i>et al.</i> 2008  | Recreationally basketball players     | 10<br>(♀) | 20.3 ± 1.2                       | 1.68 ± 14.4 | 66.9 ± 9.2  | countermovement jump    | Plyometric training                                                                                                                                                                                                                                                                         | 6 weeks, 3 x week                                                                                             |
| 19) Herman, 2008                | Recreational athletes                 | 33<br>(♀) | 22.4 ± 2.2                       | 1.67 ± 0.07 | 63.5 ± 9.2  | Stop-jump task          | Strength-training program consisted of resistance bands and exercise balls.                                                                                                                                                                                                                 | 9 weeks, 3 x week<br><b>Progression:</b> increased intensity of the exercises.                                |
| 20) Myer <i>et al.</i> 2007     | High school athletes                  | 12<br>(♀) | 16.0 ± 1.0                       | 1.65 ± 0.06 | 64.6 ± 10.4 | Drop vertical jump      | Neuromuscular training                                                                                                                                                                                                                                                                      | 7 weeks; 3 x week                                                                                             |



|                                            |                      |                                                           |                                      |                                        |                                       |                    |                                                                                                                                                                                                                                                                                                                                                                                                                                       |                                                                                                                                                                                                                                                                                                                                         |
|--------------------------------------------|----------------------|-----------------------------------------------------------|--------------------------------------|----------------------------------------|---------------------------------------|--------------------|---------------------------------------------------------------------------------------------------------------------------------------------------------------------------------------------------------------------------------------------------------------------------------------------------------------------------------------------------------------------------------------------------------------------------------------|-----------------------------------------------------------------------------------------------------------------------------------------------------------------------------------------------------------------------------------------------------------------------------------------------------------------------------------------|
| 21) Pollard <i>et al.</i><br>2006          | Soccer players       | 18<br>(♀)                                                 | 14.9*<br>*( SD not presented)        | 1.63*                                  | 58.3*                                 | Drop vertical jump | PEP Program Exercises: Warm-up, Stretching, Strengthening, Plyometric, Agilities.                                                                                                                                                                                                                                                                                                                                                     | 2-3 x weeks, during soccer season.                                                                                                                                                                                                                                                                                                      |
| 22) Myer <i>et al.</i><br>2006 (a)         | High school athletes | (a.1) 10<br>(a.2) 8<br>(♀)                                | (a.1) 15.6 ± 1.2<br>(a.2) 15.9 ± 0.8 | (a.1) 1.68 ± 0.07<br>(a.2) 1.69 ± 0.06 | (a.1) 66.4 ± 11.8<br>(a.2) 61.4 ± 7.3 | Drop vertical jump | (a.1) BALANCE - BOSU: deep hold, drop squats, jump stick landing-deep hold, both knees deep hold, crunches, swivel crunch (feet planted), single leg pelvic bridges, superman etc.<br><br>(a.2) PLYOMETRICS - Wall jumps, Squat jumps, Tuck jump (with thighs parallel), Line jumps (side to side), Line jump lateral max vertical, Lunge jump, 180° Jumps etc.<br><br>*Both groups did Strength training                             | 7 weeks; 3 x week<br><br><b>Progression:</b><br>Plyo - The exercise intensity progressed by adding complexity to the movements, and through the addition of single limb manoeuvres<br><br>Balance - As this protocol progressed, it also increased in difficulty by moving from stable ground surfaces, to relatively unstable surfaces |
|                                            |                      | * Statistical analysis pooled together both groups (n=18) |                                      |                                        |                                       |                    |                                                                                                                                                                                                                                                                                                                                                                                                                                       |                                                                                                                                                                                                                                                                                                                                         |
| 23) Myer <i>et al.</i><br>2006 (b.1 & b.2) | High school athletes | (b.1) 11<br>(b.2) 8<br>(♀)                                | (b.1) 15.6 ± 1.2<br>(b.2) 15.9 ± 0.8 | (b.1) 1.68 ± 0.07<br>(b.2) 1.69 ± 0.06 | (b.1) 66.4 ± 11.8<br>(b.2) 61.4 ± 7.3 | Single-leg hop     | (b.1) BALANCE - BOSU: deep hold, drop squats, jump stick landing-deep hold, both knees deep hold, crunches, swivel crunch (feet planted), single leg pelvic bridges, superman etc.<br><br>(b.2) PLYOMETRICS - Wall jumps, Squat jumps, Tuck jump (with thighs parallel), Line jumps (side to side), Line jump lateral max vertical, Lunge jump, 180° Jumps etc.<br><br>•Both groups did Strength training and speed training as well. | 7 weeks; 3 x week<br><br><b>Progression:</b><br>Plyo - The exercise intensity progressed by adding complexity to the movements, and through the addition of single limb manoeuvres<br><br>Balance - As this protocol progressed, it also increased in difficulty by moving from stable ground surfaces, to relatively unstable surfaces |

|                                     |                                    |                         |                                  |                                    |                                   |                                                 |                                                                                                                     |                                                                                                                                                                                     |
|-------------------------------------|------------------------------------|-------------------------|----------------------------------|------------------------------------|-----------------------------------|-------------------------------------------------|---------------------------------------------------------------------------------------------------------------------|-------------------------------------------------------------------------------------------------------------------------------------------------------------------------------------|
| 24) Louw <i>et al.</i><br>2006      | Adolescent<br>basketball players   | 5<br>(♂)                | 15.6 ± 70.8                      | 54.8 ± 9.44                        | 1.64 ± 70.23                      | Countermovement<br>jump ( jump-shot<br>landing) | Neuromuscular exercise<br>program                                                                                   | 6 weeks; 2 x week; 40<br>min each session.                                                                                                                                          |
| 25) Myer <i>et al.</i><br>2005      | Athletes                           | 41<br>(♀)               | 15.3 ± 0.9                       | 1.71 ± 0.07                        | 64.8 ± 9.96                       | Drop vertical jump                              | Neuromuscular Training:<br>CORE, Plyometric, Balance,<br>resistance and speed training.                             | 6 weeks; 3 x week;<br>each session 90 min.                                                                                                                                          |
| 26) Lephart <i>et al.</i><br>2005   | Soccer or Basketball<br>athletes   | (a) 14<br>(b) 13<br>(♀) | (a) 14.5 ± 1.3<br>(b) 14.2 ± 1.3 | (a) 1.65 ± 0.06<br>(b) 1.66 ± 0.08 | (a) 55.1 ± 8.0<br>(b) 58.3 ± 10.8 | Drop vertical jump                              | (a) Plyometric<br>(b) Basic resistance<br>training<br>program:<br>Resistance +<br>Flexibility +<br>balance training | 8 weeks; 3 x week; 30<br>min each session.                                                                                                                                          |
| 27) Irmischer <i>et al.</i><br>2004 | Physically active                  | 14<br>(♀)               | 24.0 ± 4.0<br>years of age       | 1.7 ± 0.1                          | 65.3 ± 10.5                       | Double leg landing                              | Plyometric training                                                                                                 | 9 weeks; 2 x week;<br>each session 20 min.<br><b>Progression:</b><br>3 phases lasted 2<br>weeks and the final<br>phase lasted 3 weeks.                                              |
| 28) Hewett <i>et al.</i><br>1996    | High school<br>Volleyball Athletes | 11<br>(♀)               | 15 ± 0.6                         | 1.68 ± 0.05                        | 63.32 ± 6.01                      | Volley Block Jump                               | Jumping training program                                                                                            | 6 weeks; 3 x week;<br>each session 120 min.<br><b>Progression:</b><br>The IPP was divided<br>into three phases: 1)<br>The technique, 2) The<br>fundamentals, 3) The<br>performance. |

Appendix D. Forest plots variables related to the Quadriceps and Ligament dominance theory

1) Quadriceps dominance theory

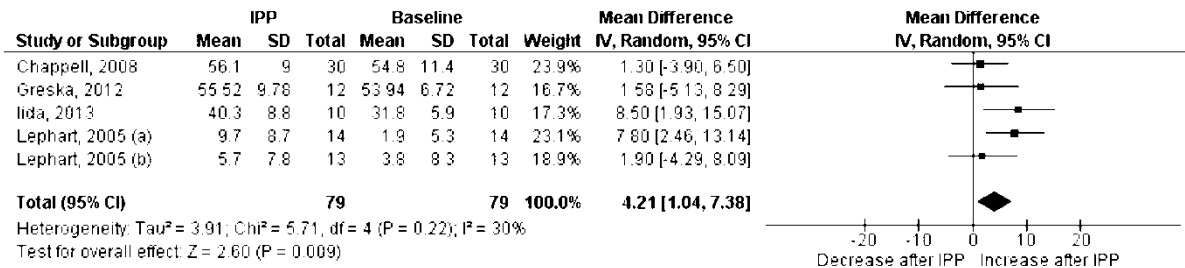

Hip Flexion at initial contact (°).

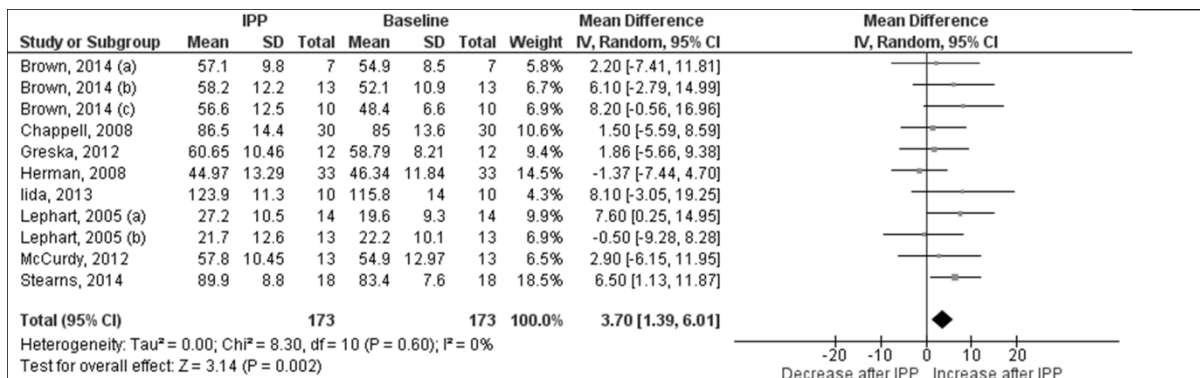

Peak Hip Flexion (°).

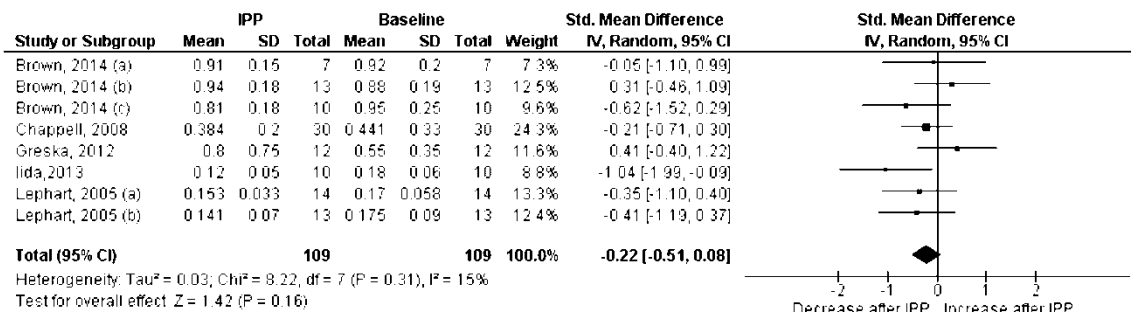

Peak hip flexion moment (Nm or Nm/BM or Nm/BW\*H). BM, body mass; BW, body weight; H, height.

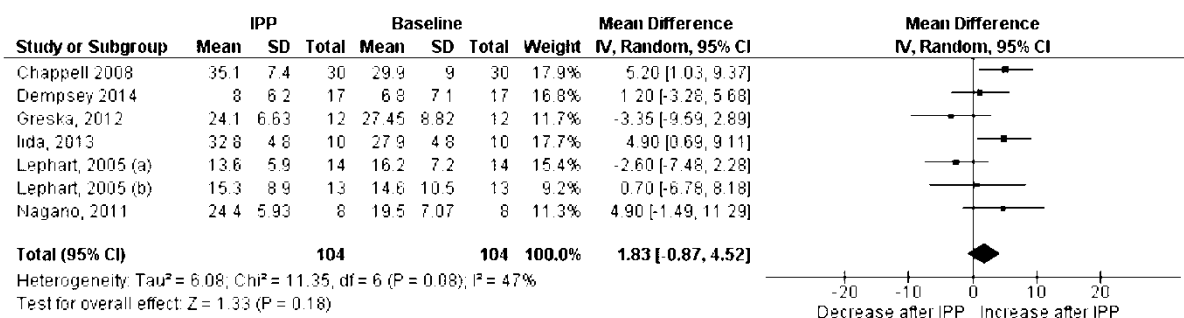

Knee Flexion at initial contact (°).

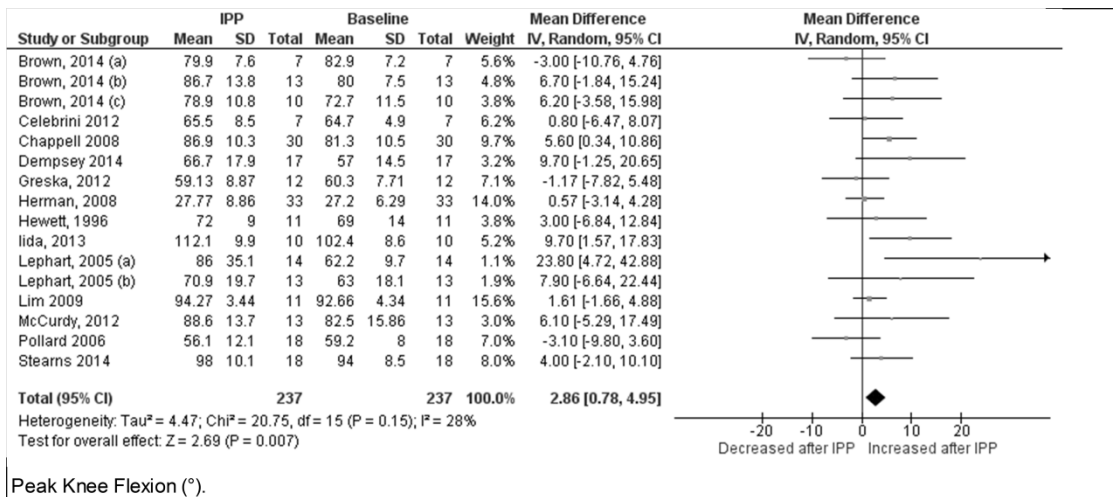

Peak Knee Flexion (°).

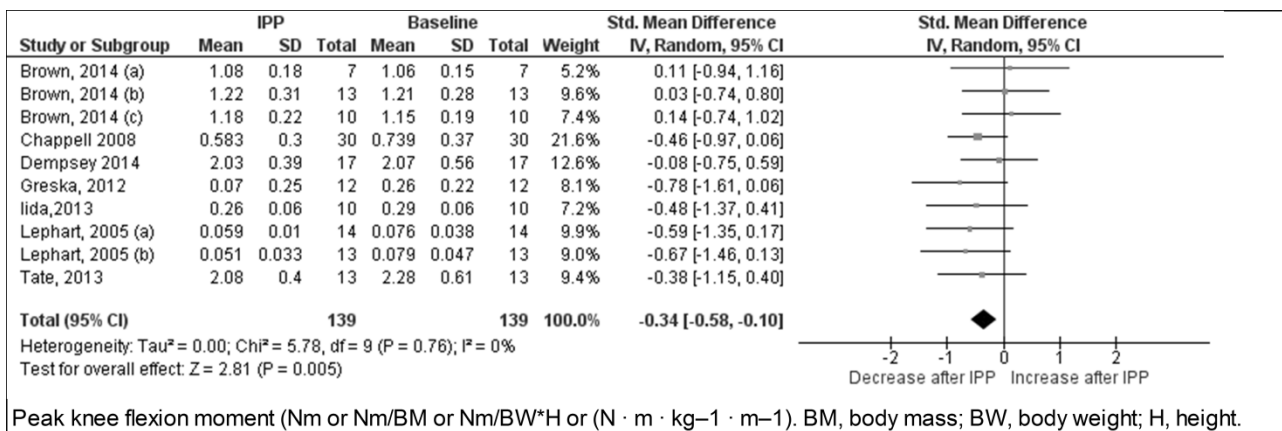

Peak knee flexion moment (Nm or Nm/BM or Nm/BW\*H or (N · m · kg<sup>-1</sup> · m<sup>-1</sup>). BM, body mass; BW, body weight; H, height.

## 2) Ligament dominance theory

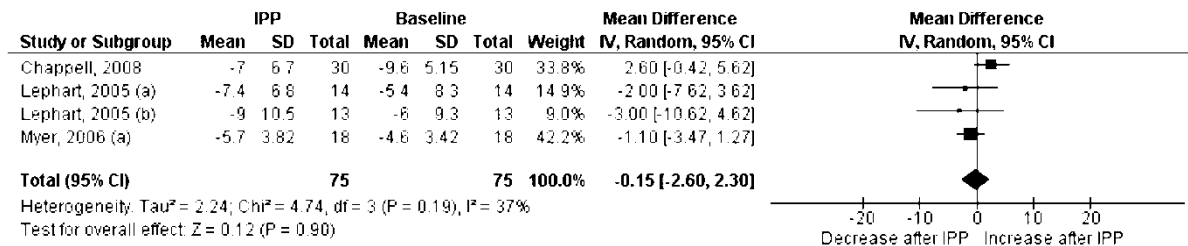

Hip Adduction at initial contact (°)

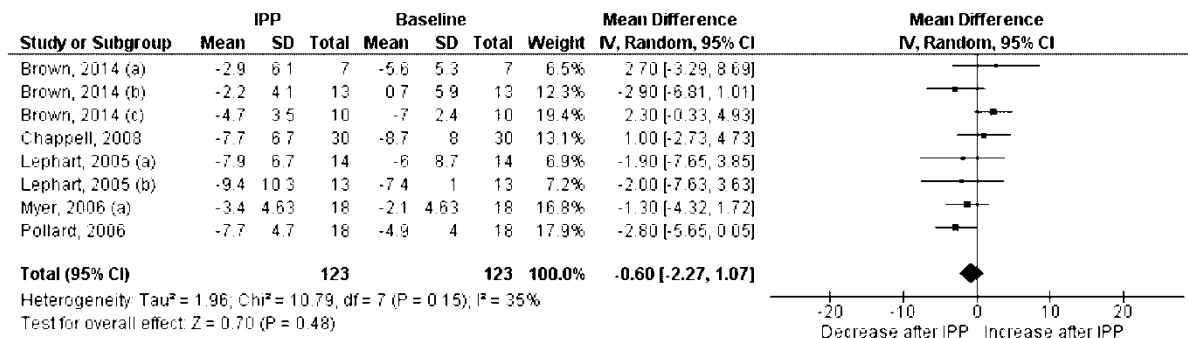

Peak Hip Adduction (°).

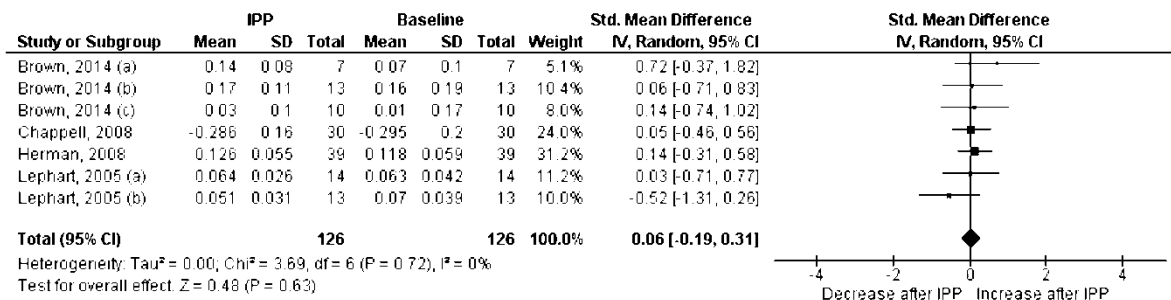

Peak Hip Adduction moment (Nm or Nm/BM or Nm/BW\*H or (N · m · kg<sup>-1</sup> · m<sup>-1</sup>). BM, body mass; BW, body weight; H, height.

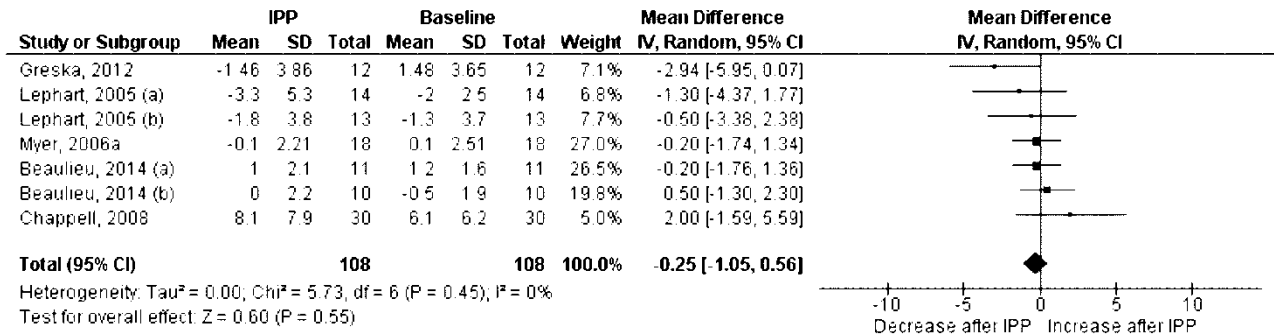

Knee abduction at initial contact (°).

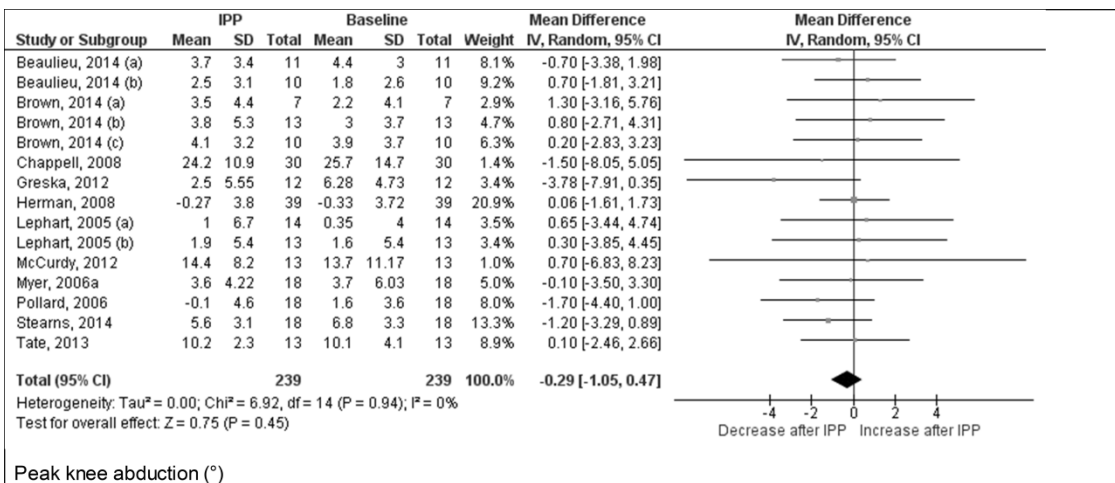

Peak knee abduction (°)
